# Supplementary material for: Few regulatory metabolites coordinate expression of central metabolic genes in Escherichia coli
Source: PubMed Central journal article supplement (PMC5293157; doi:10.15252/msb.20167402), 2017-01-03
Supplement: MSB-13-903-s001.pdf [file MSB-13-903-s001.pdf]

## Appendix for

### Few regulatory metabolites coordinate expression of central metabolic genes in *Escherichia coli*

Karl Kochanowski\*, Luca Gerosa\*, Simon Felix Brunner, Dimitris Christodoulou, Yaroslav V. Nikolaev, Uwe Sauer

\*: equal contribution

## Contents

|   |                                                                                             |    |
|---|---------------------------------------------------------------------------------------------|----|
| 1 | Appendix .....                                                                              | 2  |
| 2 | 1. Mathematical model of promoter activity.....                                             | 2  |
| 3 | 2. Using correlation to infer promoter-metabolite interactions from steady-state data ..... | 3  |
| 4 | 3. Algorithm to systematically identify regulatory metabolites.....                         | 6  |
| 5 | Appendix figures .....                                                                      | 7  |
| 6 | EV tables.....                                                                              | 23 |
| 7 | References .....                                                                            | 24 |

## 8 Appendix

### 9 1. Mathematical model of promoter activity

10 In this section, we develop a description of gene expression regulation by two mechanisms: global  
11 regulation by the expression machinery and specific regulation by metabolite-binding transcription  
12 factors. The model accounts for the contributions of the expression machinery and of transcription  
13 factors representing global and specific regulation, respectively (**eq. 1 in the main text**):

$$pa_{ij} = (E_j/K_{Ei})^{\alpha_{Ei}} \cdot \prod_{l \in \{TF\}} (1 + TF_{lj}/K_{li})^{\alpha_{li}}$$

14 Here,  $pa_{ij}$  denotes the activity of promoter  $i$  in condition  $j$ ,  $E$  denotes the activity of the expression  
15 machinery (in condition  $j$ ) and  $TF$  denotes the activity of each specific transcription factor  $l$  (in  
16 condition  $j$ ). The two parameters  $K$  and  $\alpha$  associated to each activity represent biochemical affinities  
17 and cooperative or saturating mechanisms (approximated by power law terms for mathematical  
18 convenience, see below), respectively. In this representation, transcription factors can act as  
19 activators ( $\alpha_{li} > 0$ ) or inhibitors ( $\alpha_{li} < 0$ ). The activity of each transcription factor  $l$  can in turn be  
20 described as follows (**eq. S1**):

$$TF_{lj} = TF_{conc lj} \prod_{k \in \{M\}} (1 + M_{kj}/K_{lk})^{\beta_{lk}}$$

21 where  $TF_{conc lj}$  denotes the transcription factor concentration (in condition  $j$ ),  $M$  denotes the  
22 concentration of each metabolite acting as a regulator of transcription factor activity with its  
23 transcription factor specific parameters  $K_{lk}$  and  $\beta_{lk}$ . Metabolites can activate ( $\beta_{lk} > 0$ ) or inhibit ( $\beta_{lk} < 0$ )  
24 transcription factor activity.

25 The relationship between promoter activity and global/specific regulation described in equations 1  
26 and S1 can be simplified by first transforming them into log space, second by approximating each  
27 term expressed as  $\log(1+x)$  with  $\log(x)$ , and third by normalizing e.g. for a reference condition to  
28 eliminate unknown kinetic parameters ( $\Delta \log(x_i) = \log(x_i) - \log(x_{ref})$ ) (**eq. S2**):

$$\Delta \log(pa_{ij}) \approx \alpha_{Ei} \cdot \Delta \log(E_j) + \sum_{l \in \{TF\}} \alpha_{li} \cdot \Delta \log(TF_{conc lj}) + \sum_{l \in \{TF\}, k \in \{M\}} \alpha_{li} \cdot \beta_{lk} \cdot \Delta \log(M_{kj})$$

29 We can further simplify equation S2 by assuming that transcription factor expression does not  
30 change significantly across conditions, as has been shown for *E. coli* (Ishihama *et al*, 2014; Gerosa *et*  
31 *al*, 2015) (**eq. S3**):

$$\Delta \log(pa_{ij}) \approx \alpha_{Ei} \cdot \Delta \log(E_j) + \sum_{l \in \{TF\}, k \in \{M\}} \alpha_{li} \cdot \beta_{lk} \cdot \Delta \log(M_{kj})$$

32 Thus, in this linearized approximation promoter activity can be decomposed into linear contributions  
33 from the expression machinery activity (= global regulation) and the concentration of the metabolites  
34 which regulate the activity of the respective transcription factors (= specific regulation).

35

## 2. Using correlation to infer promoter-metabolite interactions from steady-state data

While equation S3 describes the general case of a promoter under both global regulation and specific regulation by multiple transcription factors with multiple metabolite effectors, regulatory circuits operating in *E. coli* metabolism are likely to be simpler (i.e. with fewer relevant regulatory inputs). In the following section, we assess if and when operating regulatory circuits are in theory identifiable by correlating steady state measurements of promoter activity and metabolite concentrations.

There are many factors that can confound correlations of promoter activity and metabolites within regulatory circuits, as well as factors that can lead to correlations even without direct regulatory mechanistic links. Factors that can confound true regulatory links are measurement noise, ignorance of kinetic parameters (or more complex interaction mechanisms for which the model approximation above does not apply), and combinatorial contributions of many regulators and metabolites. Factors that can lead to correlations without direct links are cross-correlations between metabolites or transcription factors in many conditions, e.g. due to co-regulation. Given these limitations, how and when can metabolite-gene links mediated by transcription factors being identified by correlations?

To address these issues, we performed simulations assuming single-input promoters (= specific regulation is determined by the concentration of a single metabolite) and using the same number of data points per promoter ( $n=23$  conditions for which we quantified metabolite concentrations and promoter activities) as in our experimental data (see simulation steps at the end of the section).

In particular, we focused on two aspects: first, when is it necessary to remove the confounding effect of global regulation to ensure the recovery of potential regulatory metabolites? To address this question, we grouped the simulated promoter activities based on the relative contribution of the expression machinery (determined as the Pearson correlation coefficient between log transformed promoter activity and expression machinery activity, small contribution:  $R < 0.25$ , moderate contribution:  $0.25 < R < 0.75$ , large contribution:  $R > 0.75$ ) and calculated the distribution of correlation coefficients between log transformed metabolite and log transformed promoter activity with or without removing the expression machinery contribution. An interaction is considered to be recovered if the respective correlation coefficient exceeds the threshold (below  $-0.75$ , or above  $0.75$ ). As expected, for promoters that are predominantly affected by global regulation, the recovery of promoter-metabolite interactions is poor (simulation figure A, right panel). Conversely, for promoters whose activity is dominated by specific regulation, correcting for expression machinery effects has little impact on the recovery of regulatory metabolites (simulation figure A, left panel). These results are consistent with the experimental findings discussed in the main text (figure 4D) and confirm that removing the contribution of global regulation is pivotal especially for promoters whose activity is modulated, but not dominated, by specific regulation.

Second, we wanted to assess the impact of confounding cross-correlating metabolites on our ability to identify true regulatory metabolites. Towards this end, we simulated additional metabolites with 25%, 50%, 75%, 95% similarity to the original simulated metabolite concentration (using Pearson correlation as a similarity metric), which serve as false positives, and determined false discovery and true positive rates (simulation figure B). As illustrated by the resulting ROC curves, confounding metabolites that correlate poorly with the original metabolite (25% or 50% similarity) have a negligible effect on false discovery rates. Even when considering confounding metabolites with higher similarity (75%), the false discovery rate is below 10% when imposing a true positive rate of 75% (meaning that 75% of the true promoter-metabolite interactions present in the data set will be recovered). In the simulations, this true positive rate corresponds to a correlation threshold of 0.74, which justifies the correlation threshold used for the experimental data ( $R > 0.75$ ).

82 **Protocol used to simulate data and evaluate the performance of the approximated model in**  
 83 **recovering true metabolite-promoter interactions (repeated for 10000 data points):**

- 84 1. Uniformly sample 23 values in the range [0, 10] for the expression machinery activity  $E^*/K_E$
- 85 2. Uniformly sample 23 values in the range [0, 10] for  $[M]/K_M$  (metabolite concentration)
- 86 3. Uniformly sample  $[T]/K_T$  (transcription factor concentration) in the range [0, 10], add  
 87 random variation in transcription factor concentration of 15% (sampled from uniform  
 88 distribution) across conditions
- 89 4. Uniformly sample parameters  $\alpha_{EM}$  in the range [0, 1.5] and  $\alpha$  and  $\beta$  in the range [-4,4]
- 90 5. Calculate promoter activity based on sampled expression machinery activity, metabolite and  
 91 transcription factor concentration, and parameters using **equations 1 and S1**
- 92 6. Add 15% noise sampled from a normal distribution to metabolites and promoter activity data  
 93 to simulate measurement noise
- 94 7. Determine the correlation between log transformed promoter activity (either with or  
 95 without subtracting the log transformed expression machinery activity) and log transformed  
 96 metabolite concentration to identify putative promoter-metabolite interactions.
- 97 8. For each simulation, generate a metabolite data set with 25%, 50%, 75% similarity (=   
 98 correlation) to the original metabolite concentration, and repeat step 7.

99

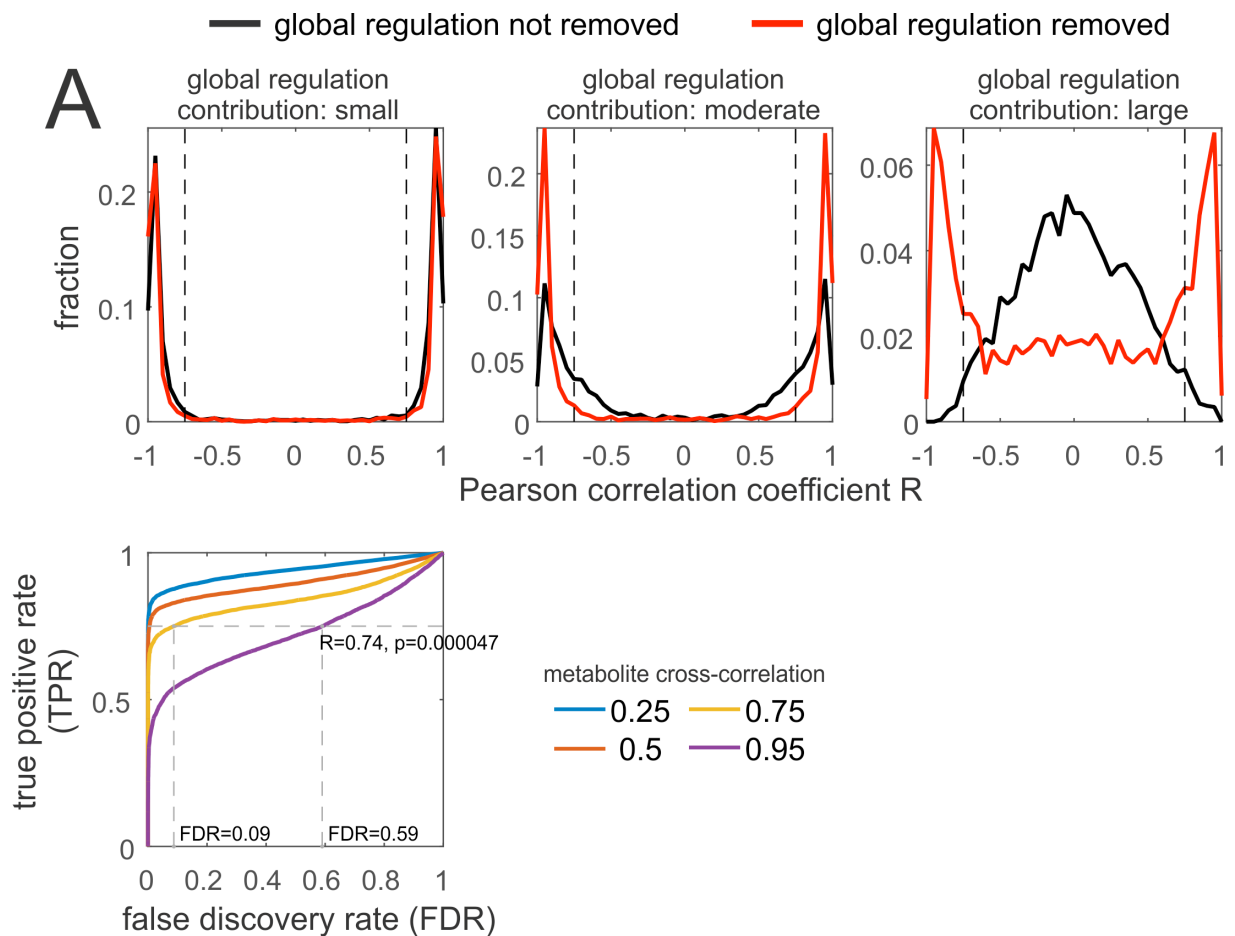

100

101 **Summary figure of simulations. A)** Distribution of Pearson correlation coefficients between  
 102 simulated metabolite concentration and promoter activity with (red) or without (black) removing the  
 103 contribution of expression machinery. For each simulated promoter ( $n = 10000$ ), its expression

104 machinery contribution was determined as the Pearson correlation coefficient between log-  
105 transformed promoter activity and expression machinery activity, and promoters were then grouped  
106 into small (R between 0 and 0.25, left panel), moderate (R between 0.25 and 0.75, middle panel) and  
107 large (R above 0.75, right panel) contribution. Dashed lines: correlation thresholds for identification  
108 of an interaction ( $R < -0.75$  or  $R > 0.75$ ). **B**) Impact of confounding metabolites on the identification of  
109 promoter-metabolite interactions. For each simulated promoter and metabolite ( $n = 10000$ ), an  
110 additional set of metabolites with 25% (blue), 50% (red), 75% (orange), or 95% (purple) similarity to  
111 the original data (similarity defined as Pearson correlation coefficient between original and additional  
112 metabolite data) was generated and used to calculate the correlation between log-transformed  
113 promoter activity (after removing expression machinery contribution) and each confounding  
114 metabolite (corresponding to a false-positive regulatory signal). False discovery and true positive  
115 rates were calculated using the p-value of the correlation as a metric. Horizontal dashed line: true  
116 positive rate = 0.75, corresponding to a correlation coefficient threshold of 0.74 (with p-value  
117 0.000047). Left vertical dashed line: FDR when assuming a true positive rate of 0.75 and a similarity  
118 of confounding metabolites of 0.75. Right vertical dashed line: FDR when assuming a true positive  
119 rate of 0.75 and a similarity of confounding metabolites of 0.95.

120

121 3. Algorithm to systematically identify regulatory metabolites

122

123 **Perform separately for each promoter:**

- 124 1. Subtract first singular vector to obtain the isolated specific regulation S across conditions
- 125 2. Linear regression of equation  $S = p * M$ , where p denotes the promoter- and metabolite
- 126 specific parameter (corresponding to the lumped parameter  $(\alpha_{i,l} * \beta_{l,k})$  in equation 3 in the
- 127 main text) to be determined in the regression. Exclude conditions in which the metabolite
- 128 could not be quantified
- 129 3. Calculate Pearson correlation coefficient R between S and its reconstruction based on  $p * M$
- 130 4. For each metabolite pair M1 + M2: linear regression of equation  $S = p1 * M1 + p2 * M2$  as
- 131 above. Exclude conditions in which either of the metabolites could not be quantified.
- 132 5. Calculate Pearson correlation coefficient R between S and its reconstruction based on  $(p1 * M1 + p2 * M2)$
- 133
- 134 6. Assess whether any metabolite pair explains S better than the best single metabolite based
- 135 in the difference in Akaike Information Criterion (AIC):
- 136 a. Calculate AIC and  $\Delta AIC$  as described in material and methods for each metabolite
- 137 pair as well as the best single metabolite.
- 138 b. Identify metabolite pairs which pass all cut-offs:  $R > 0.75$ ; at least 20% increase in R
- 139 compared to the best single metabolite;  $\Delta AIC$  above a cut-off corresponding to a
- 140 relative likelihood of  $> 50$  (Burnham *et al*, 2011).
- 141 7. If more than one metabolite pair pass all aforementioned cut-offs: select the one with the
- 142 highest correlation coefficient as the potential regulatory metabolite pair of the respective
- 143 promoter
- 144 8. If no metabolite pair passes all cut-offs: Select the single metabolite with the highest
- 145 correlation coefficient (given a general cut-off of  $R > 0.75$ ) as the potential single regulatory
- 146 metabolite of the respective promoter
- 147 9. If no single metabolite passes the correlation coefficient cut-off of  $R > 0.75$ : don't assign any
- 148 regulatory metabolites to the respective promoter
- 149 10. The sign of each metabolite-promoter interaction was determined based on the fitted
- 150 regression parameters p (or p1, p2): if  $p < 0$ , the interaction is defined as negative
- 151 (metabolite has negative effect on S), if  $p > 0$ , the interaction is defined as positive
- 152 (metabolite has positive effect on S). The sign of the correlation coefficient (e.g. in figure 3B
- 153 or S13) is then set accordingly.

154

155 **Appendix figures**

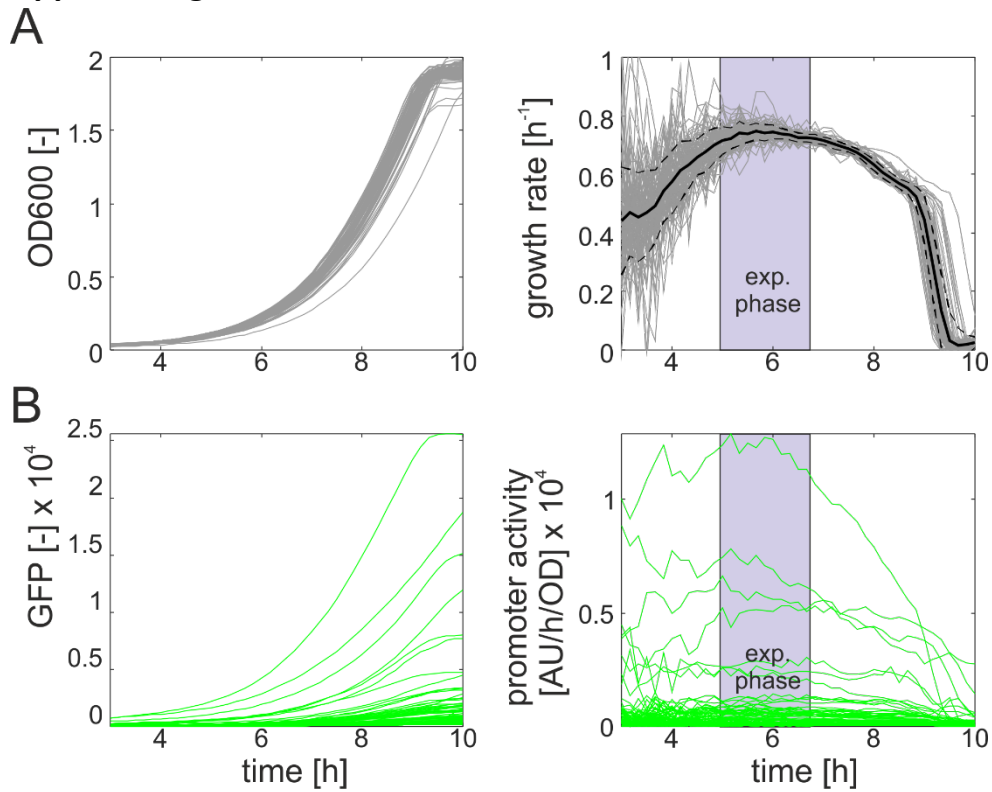

156

157 **Appendix Figure S1. Quantification of steady state promoter activity and growth rate from OD600**  
 158 **and GFP time course data.** Example condition: M9 minimal medium with 2 g/L glucose. A) Left panel:  
 159 Time course OD600 curves of 96 reporter strains (95 promoter reporter strains, plus one promoter-  
 160 less reporter strains to determine the background signal). Right panel: Corresponding point-to-point  
 161 growth rate (calculated by two-point finite difference numerical approximation, see (Gerosa *et al*,  
 162 2013)). Black continuous line: mean point-to-point growth rate across all strains. Dashed black lines:  
 163 corresponding standard deviation. B) Left panel: time course of GFP measurements (see methods).  
 164 Right panel: Corresponding point-to-point promoter activity (see methods and (Gerosa *et al*, 2013)).  
 165 Exponential phase was identified visually as the time window with the highest and approximately  
 166 constant growth rate (marked with violet box), and mean promoter activity and growth rate were  
 167 calculated in this window for each promoter.

168

169

170

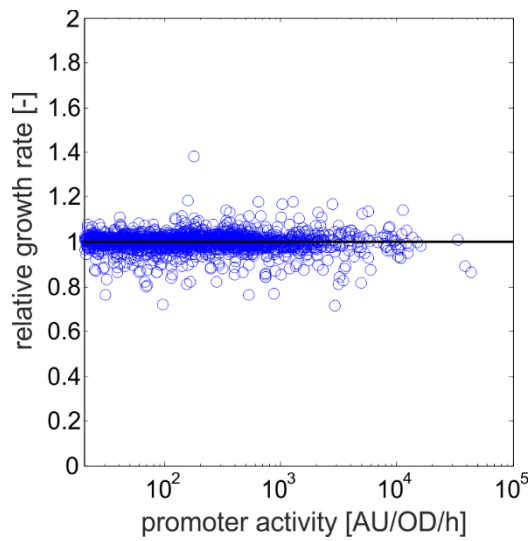

171

172 **Appendix Figure S2. GFP expression does not impair growth rate.** Promoter activities of all 95 tested  
173 promoter strains in all 26 tested conditions plotted against the growth rate of the respective strain  
174 (relative to the mean growth rate in the same condition).

175

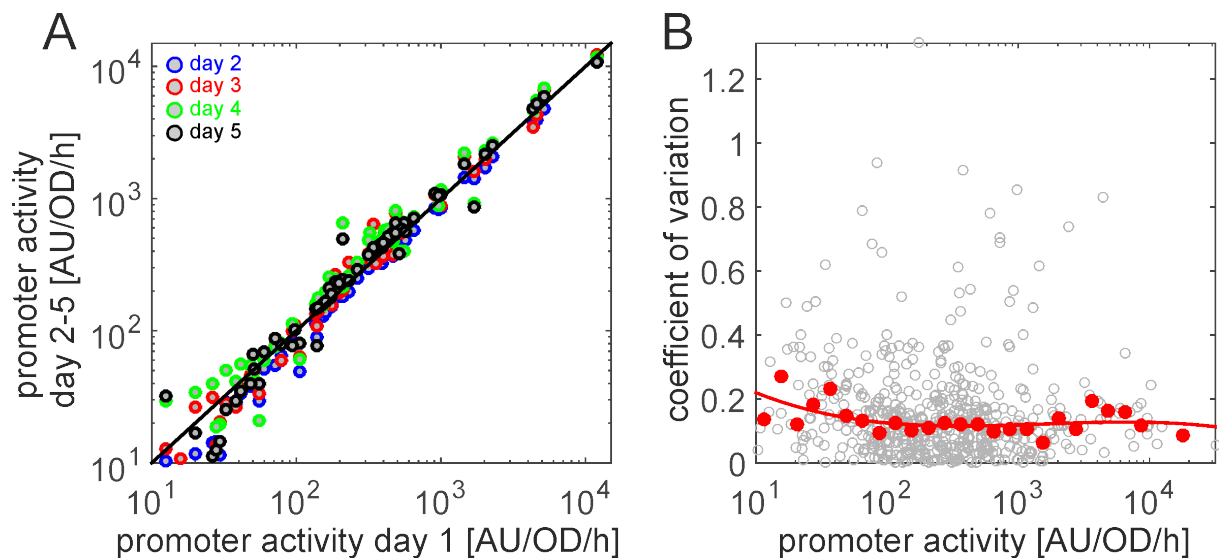

176

177 **Appendix Figure S3. Day-to-day reproducibility and estimate of coefficient of variation of promoter**  
178 **activity measurements.** All 64 promoters with promoter activities above background (see main text)  
179 were considered. **A)** Promoter activity during exponential growth (condition: M9 glucose) was  
180 determined in five independent experiments. Median day-to-day variation is 15%. **B)** Coefficient of  
181 variation (standard deviation divided by mean) in 9 conditions plotted against the mean promoter  
182 activity (gray circles, based on 2 to 5 replicates). Red circles: median coefficient of variation for 24  
183 evenly spaced bins (in log scale). Red line: polynomial fit of median coefficients of variation, which  
184 allows to estimate the coefficient of variation also for promoters without replicate measurements  
185 (Keren *et al*, 2013).

186



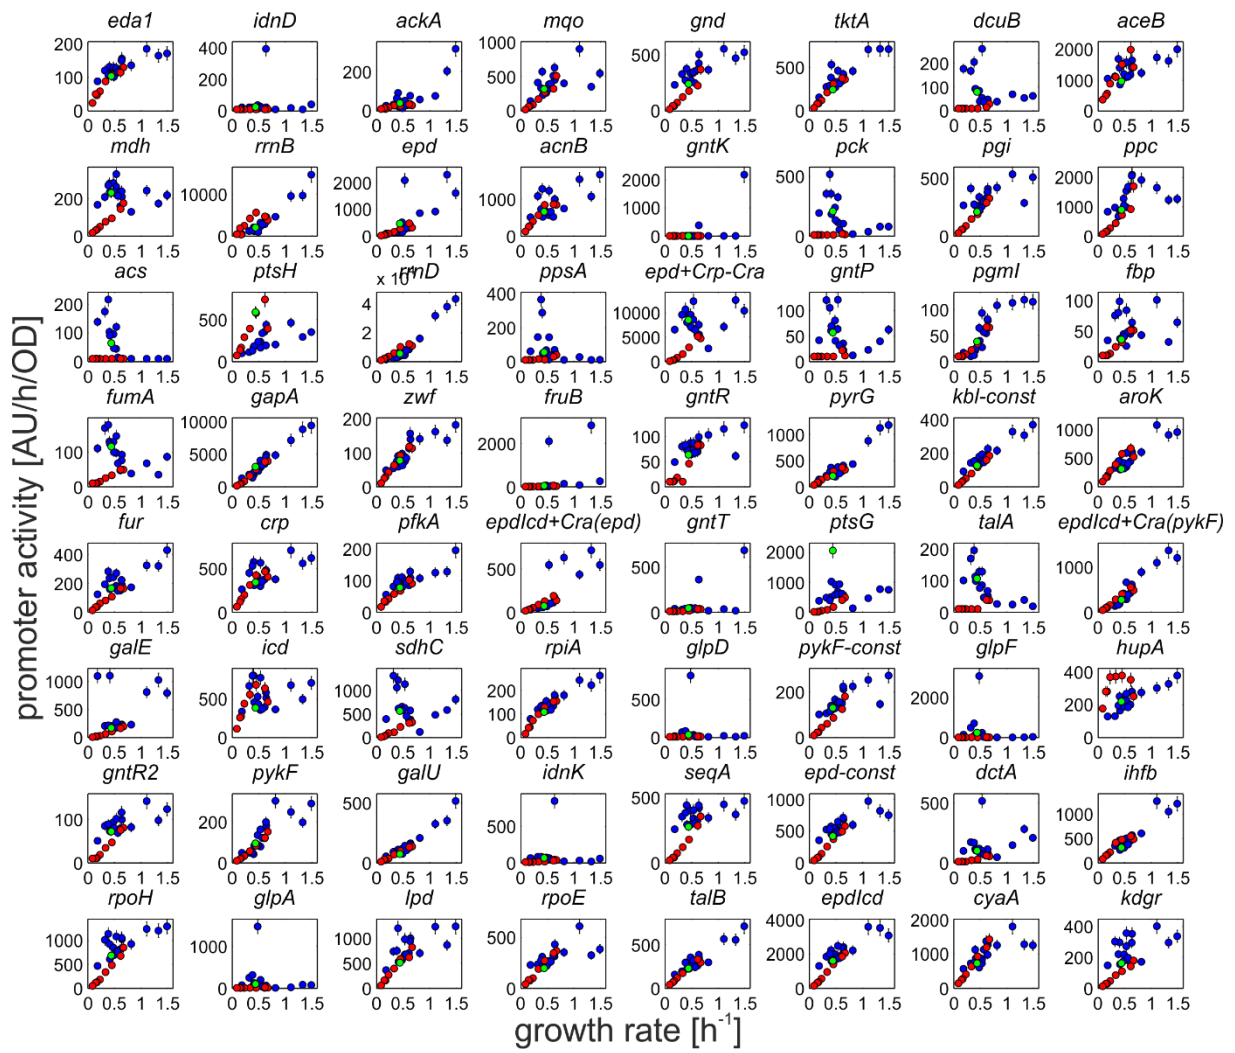

187

● carbon source ● chloramphenicol ● 5 mM cyclic AMP

188

**Appendix Figure S4. Steady state promoter activity of 64 promoters in 26 conditions.** Error denote standard deviation and were estimated based on day-to-day reproducibility measurements (see appendix figure 3).

191

192

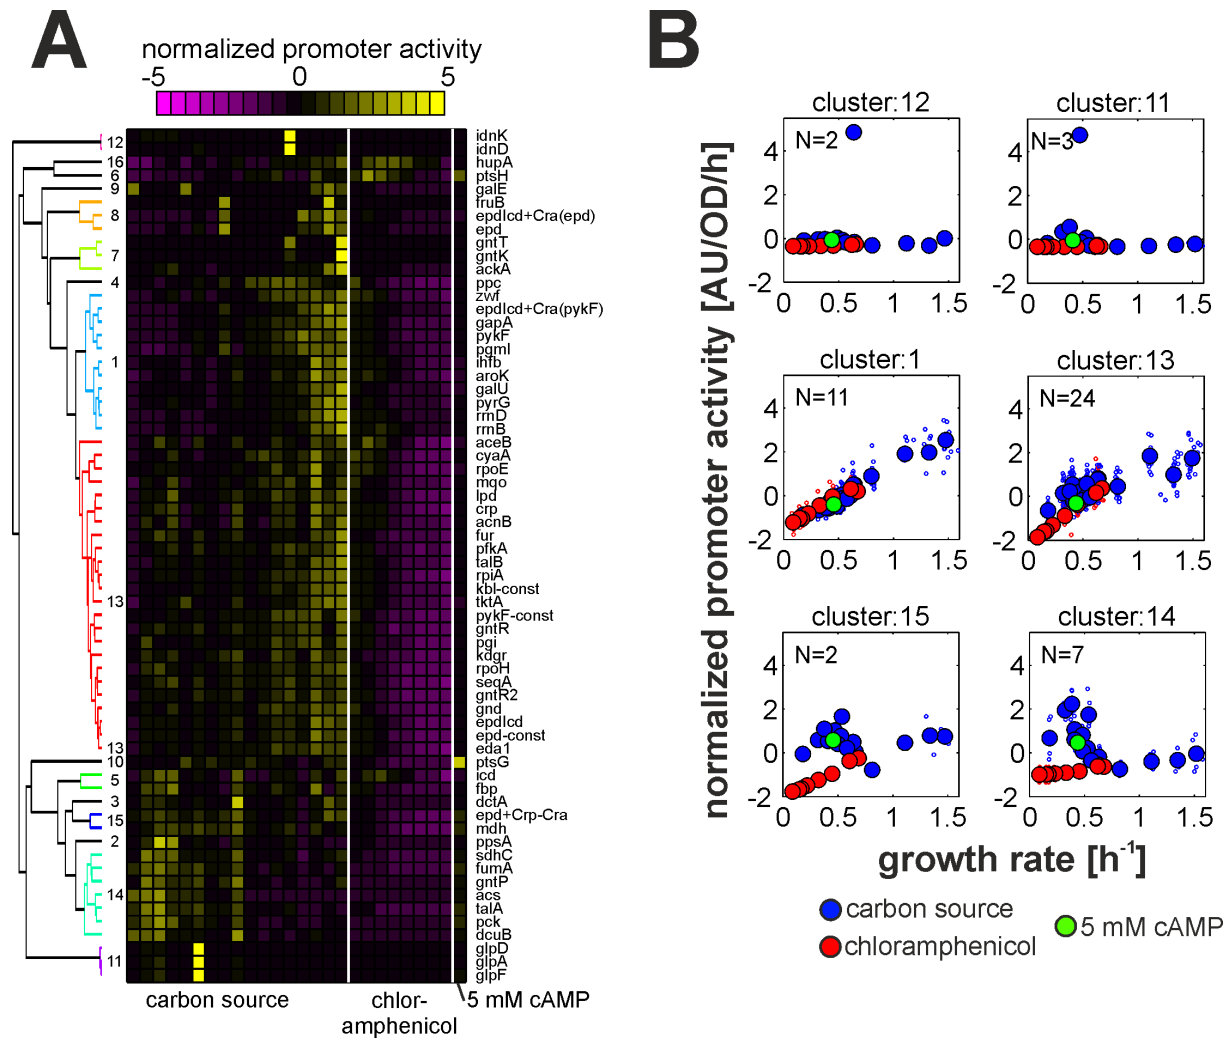

194

195 **Appendix Figure S5. Hierarchical clustering of central metabolic promoters. A)** Steady state  
 196 promoter activities in various carbon sources as well as different sub-lethal doses of chloramphenicol  
 197 and supplementation of 5 mM cyclic AMP (same data as in main figure 1). Promoter activities were  
 198 normalized by z-score normalization and sorted by 1-dimensional hierarchical clustering across  
 199 promoters. MATLAB commands: 1. step *pdist* (distance metric: Pearson correlation coefficient  
 200 between promoters), 2. step *linkage* (algorithm: unweighted average distance), 3. step *cluster* (cut-  
 201 off: 0.225, clustering metric: distance). Carbon sources were sorted by increasing growth rate (from  
 202 left to right), Chloramphenicol data were sorted by increasing chloramphenicol concentrations (from  
 203 left to right). Last column: M9 glucose with 5 mM cyclic AMP (cAMP). **B)** Selected clusters for each  
 204 conditions plotted against their respective steady state growth rate. Large filled circles: mean  
 205 promoter activities of all promoters in respective cluster. Small non-filled circles: promoter activities  
 206 of all individual promoters in respective cluster.

207

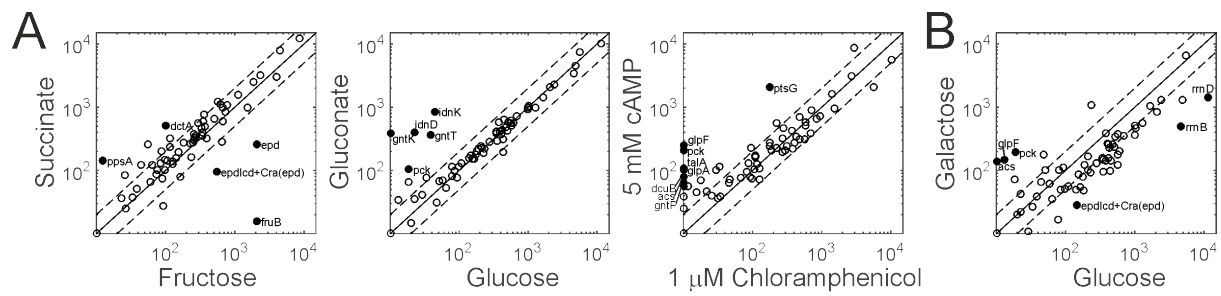

208

209 **Appendix Figure S6. Measured steady state promoter activity in pairwise conditions. A) Condition**  
 210 **pairs with highly similar growth rates.** Fructose:  $0.53 \text{ h}^{-1}$ . Succinate:  $0.53 \text{ h}^{-1}$ . Glucose:  $0.64 \text{ h}^{-1}$ .  
 211 Gluconate:  $0.65 \text{ h}^{-1}$ .  $1 \mu\text{M}$  Chloramphenicol in M9 glucose:  $0.45 \text{ h}^{-1}$ .  $5 \text{ mM}$  cAMP in M9 glucose:  $0.44$   
 212  $\text{h}^{-1}$ . **B) Pair of conditions which differ greatly in growth rate.** Glucose:  $0.64 \text{ h}^{-1}$ . Galactose:  $0.18 \text{ h}^{-1}$ .  
 213 Median absolute log<sub>2</sub>-fold change between Glucose and Galactose conditions: 1.1. Black circles:  
 214 promoters whose activity deviates by more than 5-fold in the pairwise conditions ( $>5x$ , or  $<0.2x$ ),  
 215 labeled with the respective promoter name. Dashed lines: commonly used log<sub>2</sub> fold-change cut-offs  
 216 ( $\log_2$  fold-change  $> 1$ , or  $< -1$ ).

217

218

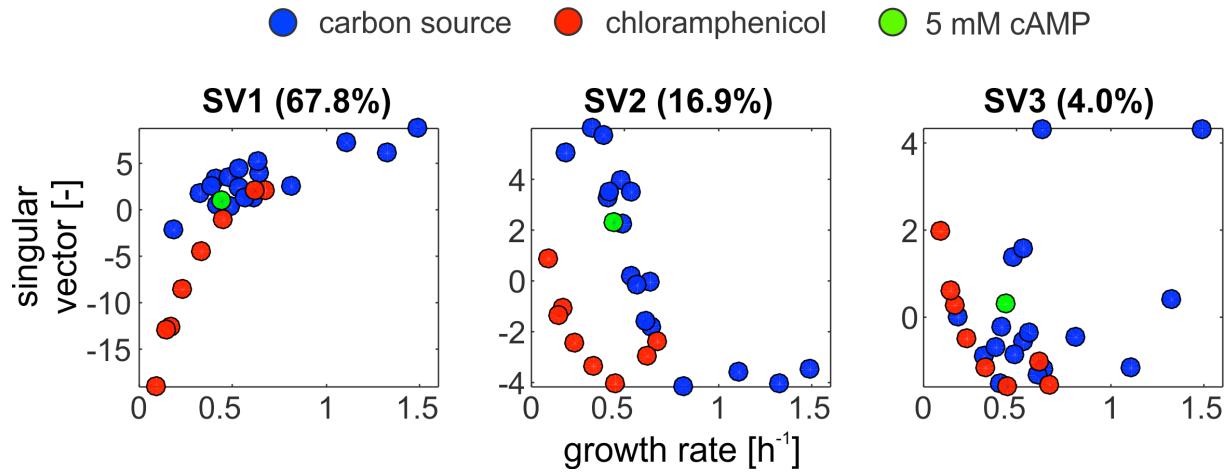

219

220 **Appendix Figure S7. Singular value decomposition of steady state promoter activity.** Shown: Top  
 221 three singular vectors explaining most of the data set variability. Singular value decomposition was  
 222 performed on log transformed and z-score normalized promoter activity data for 64 central  
 223 metabolic promoters as described in the main text, using the MATLAB command *svds*. Numbers in  
 224 brackets: percentage of variance in data set explained by respective singular vector.

225

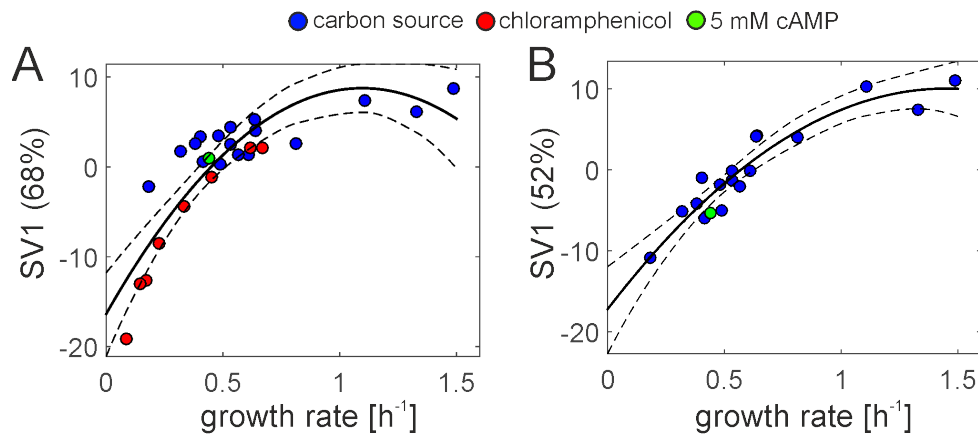

226

227 **Appendix Figure S8. Singular value decomposition of all tested conditions (A), and excluding**  
 228 **chloramphenicol treatment (B).** Shown is the first singular vector, which explains 68% (A) and 52%  
 229 (B) of the variance in the data set, respectively. Black line denotes the polynomial fit of the  
 230 relationship between SV1 and the growth rate, and the dashed lines denote the 95% confidence  
 231 interval of the fit.

232



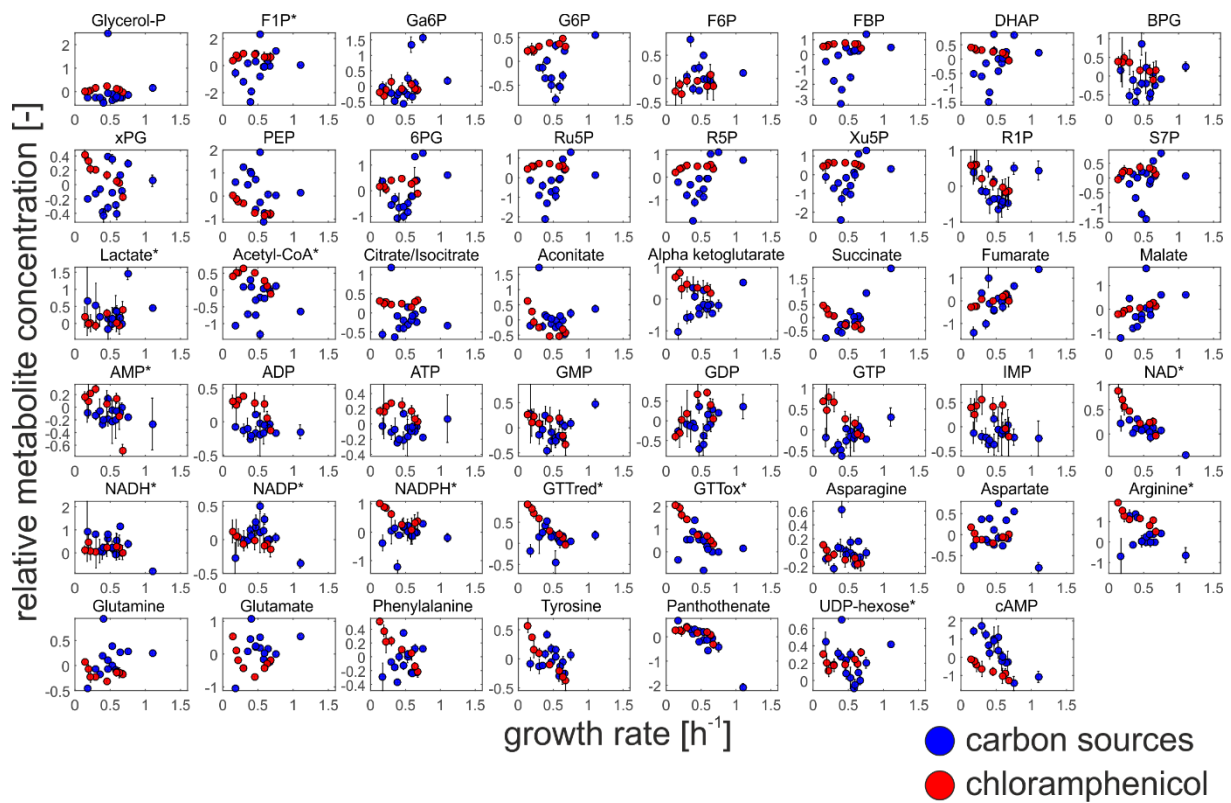

245

246 **Appendix Figure S10. Intracellular concentrations of central carbon metabolites during exponential**  
 247 **growth.** Absolute metabolite concentrations of 47 central carbon metabolism metabolites in 23  
 248 conditions (transformed using the natural logarithm and normalized by mean metabolite  
 249 concentration across conditions) as quantified by targeted LC/LC mass spectrometry. Metabolites  
 250 which were present in the medium were omitted from the quantification. For metabolites marked  
 251 with (\*), no absolute quantification was available. Their concentration was quantified relative to M9  
 252 glucose, and then transformed using the natural logarithm. Error bars denote standard deviation of  
 253 four biological replicates.

254

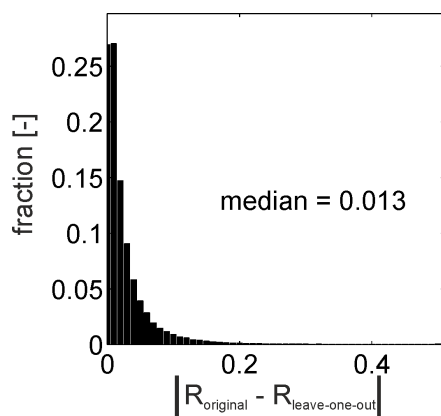

255

256 **Appendix Figure S11. Robustness of fit between each promoter's specific regulation component**  
 257 **and each metabolite against data point elimination.** Robustness of fit was performed by  
 258 systematically omitting one condition and repeating the analysis outlined in figure 3A. Shown here:  
 259 distribution of absolute difference in correlation coefficient R (Pearson correlation) between the  
 260 original coefficients (all conditions included) and coefficients when excluding one condition for all  
 261 combinations of promoters, metabolites, and omitted conditions.

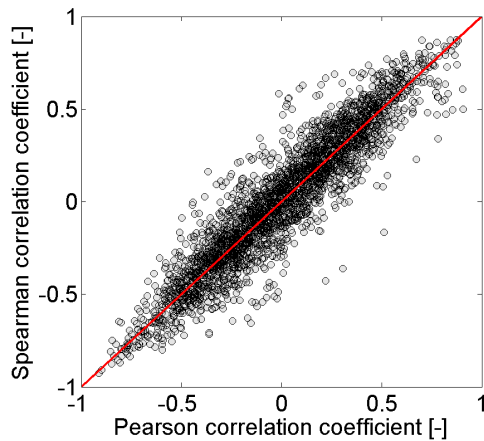

263

264 **Appendix Figure S12. Comparison of linear (Pearson) and rank (Spearman) correlation as metrics to**  
 265 **identify promoter-metabolite interactions.** The ability of each metabolite to explain each promoter's  
 266 specific transcriptional regulation component (see figure 3A) was assessed using Pearson and  
 267 Spearman correlation coefficients, respectively.

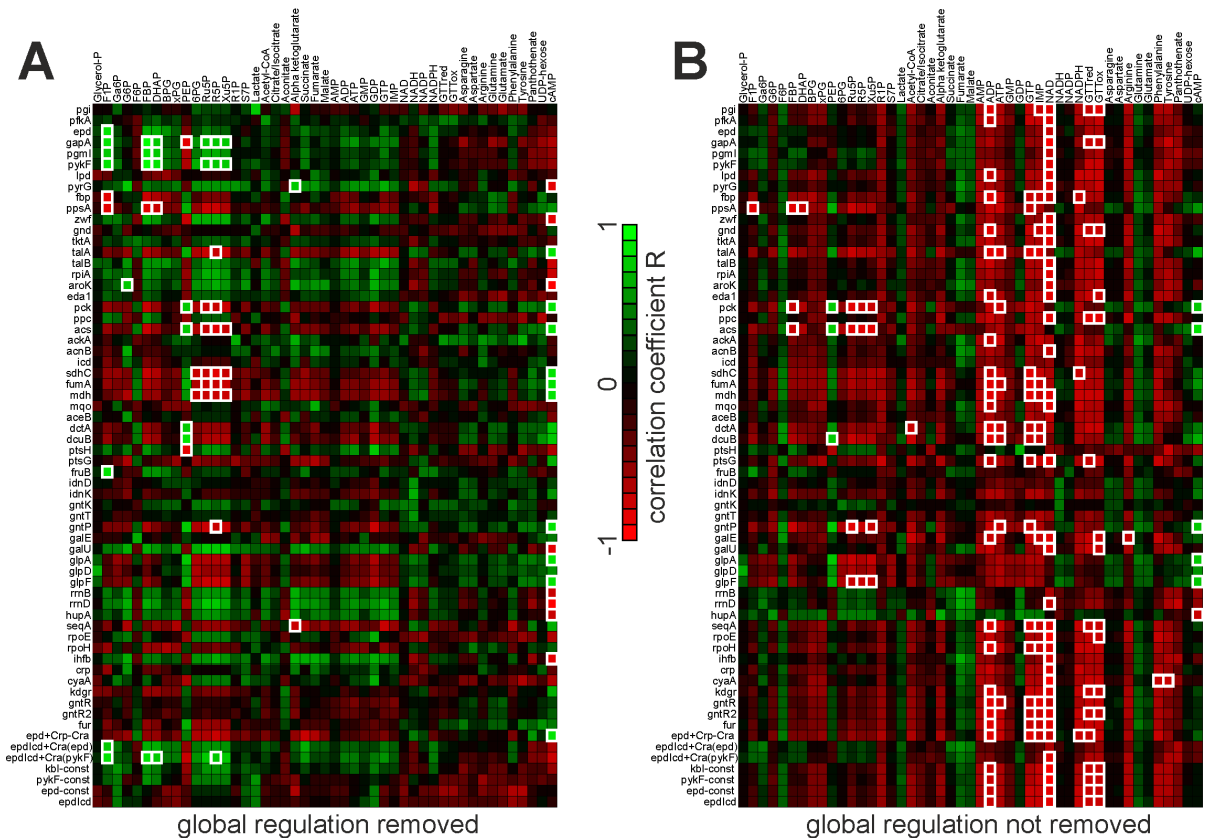

268

269 **Appendix Figure S13. Identification of promoter-metabolite interactions in absence or presence of**  
 270 **global transcriptional regulation. A)** Heatmap of Pearson correlation coefficients between measured  
 271 specific transcriptional regulation (after removal of the respective global regulation component) and  
 272 its reconstruction based on one metabolite (as described in figure 3A) for all promoter-metabolite  
 273 pairs. Pairs with correlation coefficients above 0.75 or below -0.75 are shown with thick white edges,  
 274 all of which were highly significant even after adjusting p-values for multiple hypothesis testing (q-  
 275 value < 0.001, correction for multiple hypothesis testing as described by (Storey, 2002)).  
 276 Corresponding data: EV table 7. **B)** Heatmap of Pearson correlation coefficients between log

277 normalized promoter activity (consisting of global and specific transcriptional regulation) and its  
 278 reconstruction based on one metabolite (as described in figure 3A) for all promoter-metabolite pairs.  
 279 Pairs with correlation coefficients above 0.75 or below -0.75 are shown with thick white edges.

280

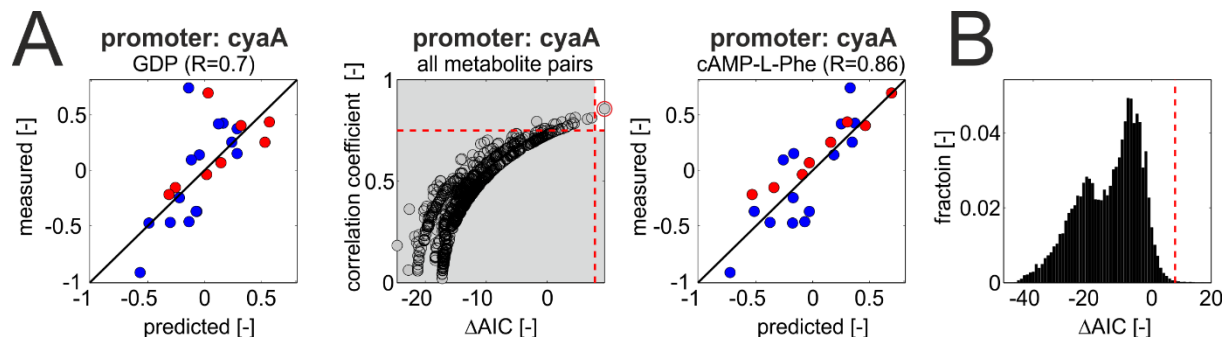

281

282 **Appendix Figure S14. Identification of pairwise metabolic regulatory signals affecting the specific**  
 283 **transcriptional regulation of promoters. A)** Outline of approach with example promoter *cyaA*. Left  
 284 panel: Predicted and measured specific regulation for best single metabolite (GDP), with the  
 285 correlation coefficient R in brackets. Blue circles: carbon sources. Red circles: chloramphenicol  
 286 conditions. Middle panel: predictive power of all pairwise metabolite combinations (calculated as the  
 287 correlation coefficient R between the promoter's measured specific regulation and its prediction  
 288 based on the respective metabolite pair) plotted against the difference in Akaike Information  
 289 Criterion (AIC), which penalizes the number of parameters in different models, compared to the best  
 290 single metabolite ( $\Delta AIC = AIC_{bestSingle} - AIC_{metabolitePair}$ ). Horizontal red dashed line: threshold for R  
 291 (0.75). Vertical red dashed line: threshold for  $\Delta AIC$  (based on a relative likelihood threshold of 50,  
 292 signifying that the respective metabolite pair is 50-times more likely to explain the data than the best  
 293 single metabolite (Burnham *et al*, 2011)). Right panel: Predicted and measured specific regulation for  
 294 best metabolite pair, namely cyclic AMP (cAMP) and L-phenylalanine (L-Phe), with the correlation  
 295 coefficient R in brackets. Blue circles: carbon sources. Red circles: chloramphenicol conditions. **B)**  
 296 Distribution of  $\Delta AIC$  across of promoter-metabolite pair combinations. Note that the vast majority of  
 297 these combinations have negative  $\Delta AIC$ 's, signifying that these metabolite pairs explain the  
 298 respective promoter's specific regulation worse than the best single metabolite. Vertical red dashed  
 299 line: threshold for  $\Delta AIC$  (same as in A).

300



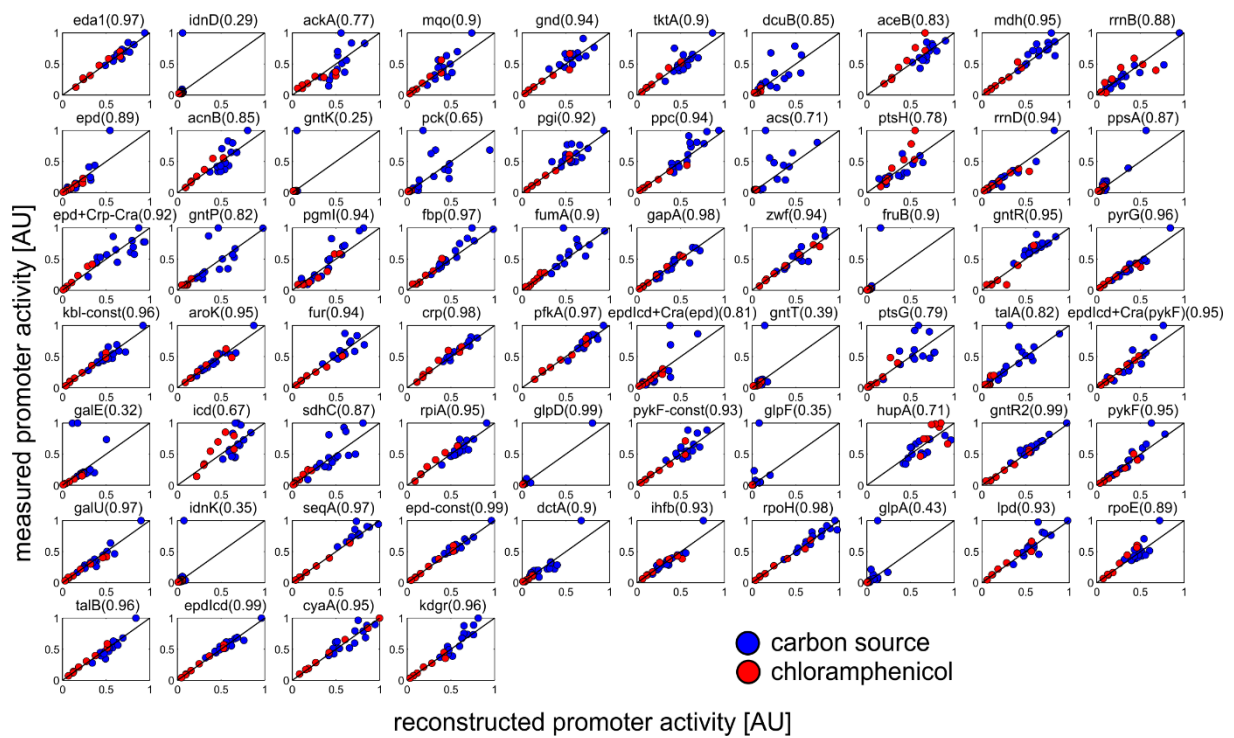

301

302 **Appendix Figure S15. Reconstruction of individual promoters in 23 conditions based on the**  
 303 **quantified regulatory network.** The activity of each promoter was reconstructed from its global and  
 304 specific regulation components based on the network depicted in figure 4A, and then reverted to  
 305 linear scale. Only conditions with available metabolite and promoter activity data were considered.  
 306 To aid readability, measured and predicted promoter activities were further normalized to the  
 307 maximal measured promoter activity of each promoter. In brackets: Pearson correlation coefficient  
 308 between measured and reconstructed promoter activity.

309

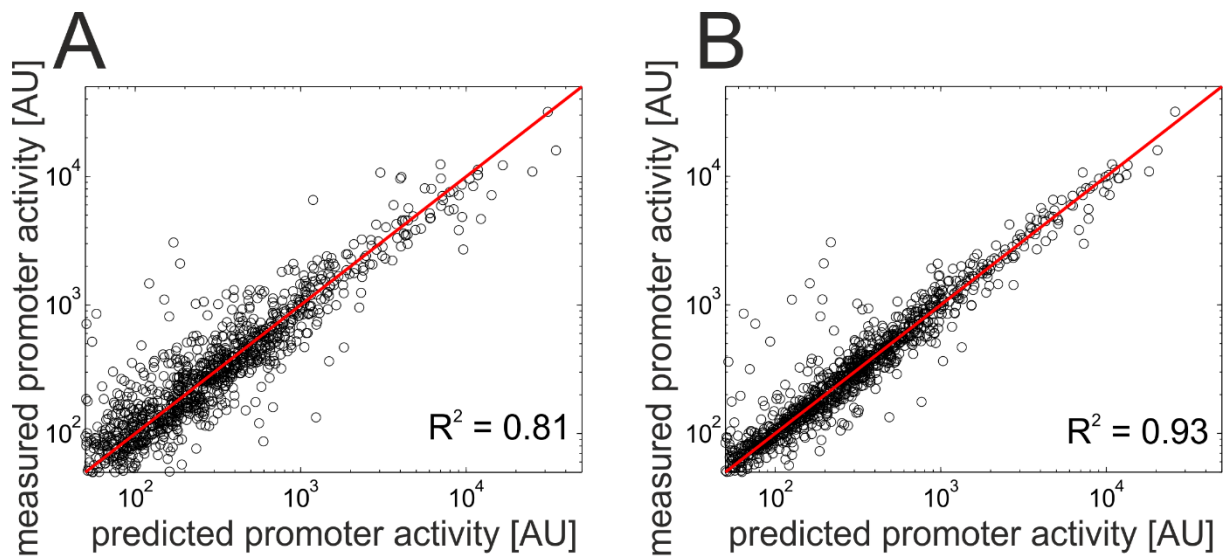

310

311 **Appendix Figure S16. Leave-one-condition-out cross-validation. A)** Comparison of measured and  
 312 predicted promoter activity for individual conditions that were excluded in the analysis. The impact  
 313 of global regulation in the excluded condition was predicted from its growth rate based on fitted  
 314 relationship between growth rate and singular vector 1 depicted in figure 2B. To predict the impact  
 315 of specific regulation, the topology of the network shown in figure 4A was used as a basis, and the  
 316 parameters of each promoter-metabolite interaction were re-fitted while omitting the data-point  
 317 belonging to the excluded condition. Using these re-fitted parameters, each promoter's specific  
 318 regulation component was then predicted based on the respective metabolite concentration. Finally,  
 319 each promoter's summed contribution of global and specific regulation was reverted back to linear  
 320 scale. This procedure was repeated for each condition.  $R^2$  denotes the overall goodness of fit  
 321 between measured and predicted promoter activity across all conditions and promoters. **B)** Same as  
 322 A). However, while each promoter's specific regulation component was still predicted from the  
 323 respective metabolite as described above, its global regulation component was not fitted, but rather  
 324 directly obtained from singular value decomposition of the experimental data (corresponding to  
 325 singular vector 1). The improved goodness-of-fit compared to A) suggests that discrepancies  
 326 between measured in predicted promoter activity in A) are largely caused by deviations of directly  
 327 quantified global regulation from its growth-rate dependent fit (figure 2B).

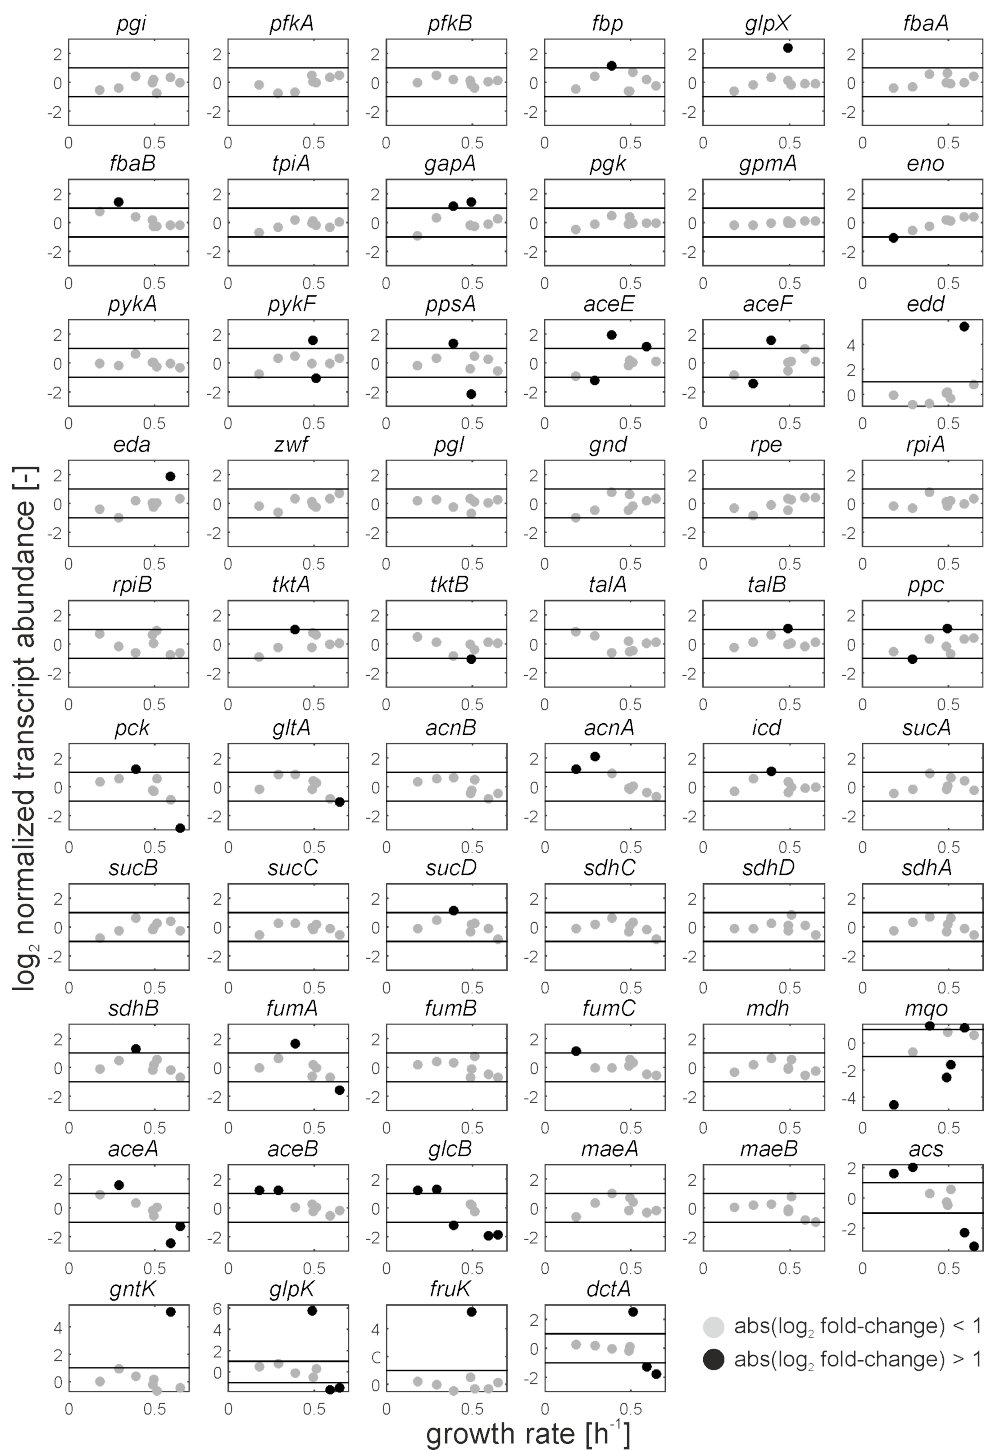

328

329 **Appendix Supplementary figure S17. Transcript abundance of central metabolic genes in 8**  
 330 **different carbon source conditions.** Data from Gerosa et al, 2015. Cell Systems (mean of three  
 331 biological replicates,  $\log_2$  normalized). Grey circles: absolute  $\log_2$  fold-change < 1. Black circles:  
 332 absolute  $\log_2$  fold-change > 1.

333

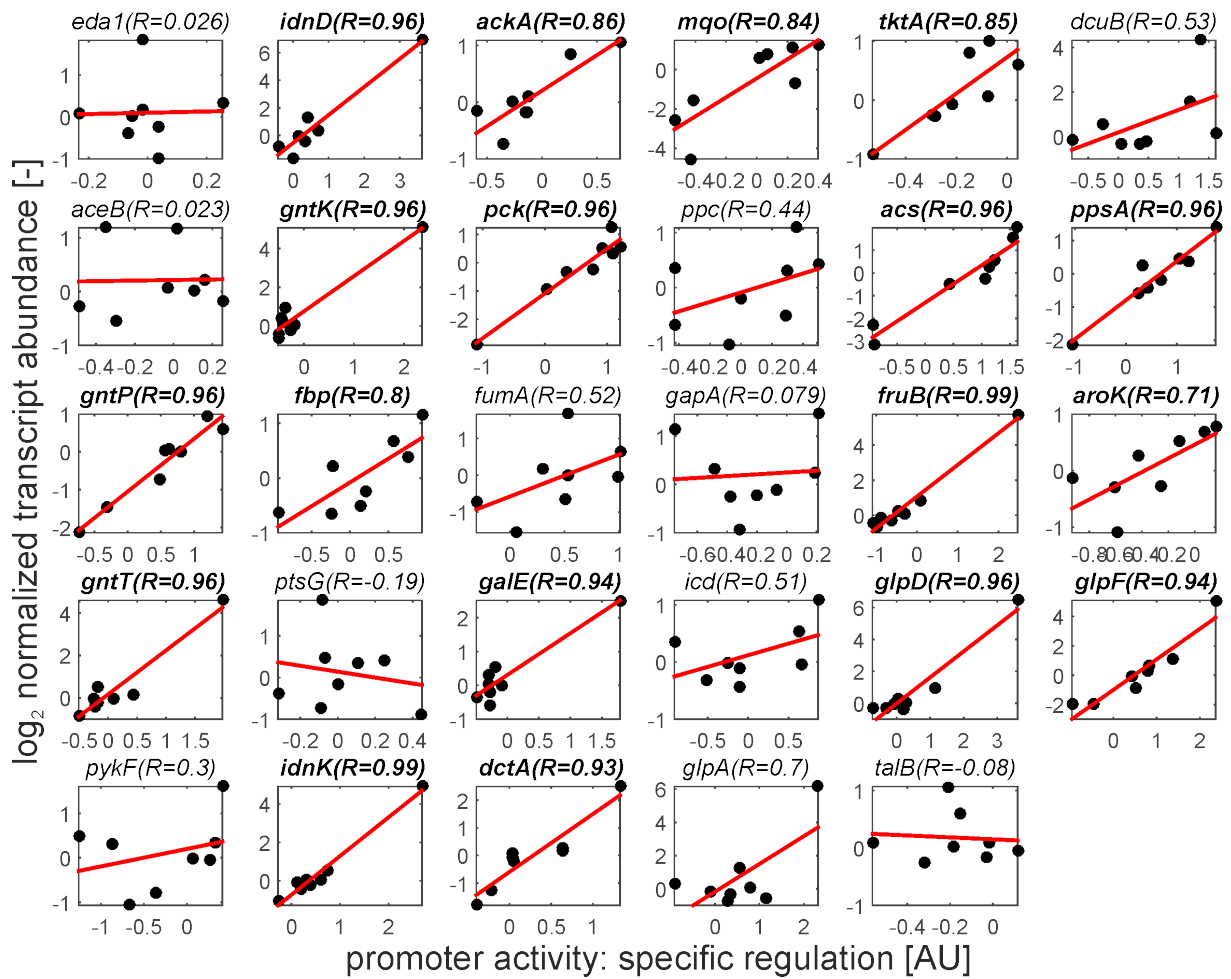

334

335 **Appendix figure S18. Relationship between transcript abundance and specific regulation**  
 336 **component of promoter activity in central metabolic genes.** Y-axis: Transcript abundance data as  
 337 described in appendix figure S17. Only transcripts whose abundance changed >2-fold in at least one  
 338 condition were considered. X-axis: specific regulation component of corresponding promoter activity  
 339 data (after normalization and removal of global regulation component, see main text). In brackets:  
 340 Pearson correlation coefficient between transcript and promoter activity data (**name in bold**: p-value  
 341 of correlation < 0.05). Red lines: linear regression as visual aid.

342

343

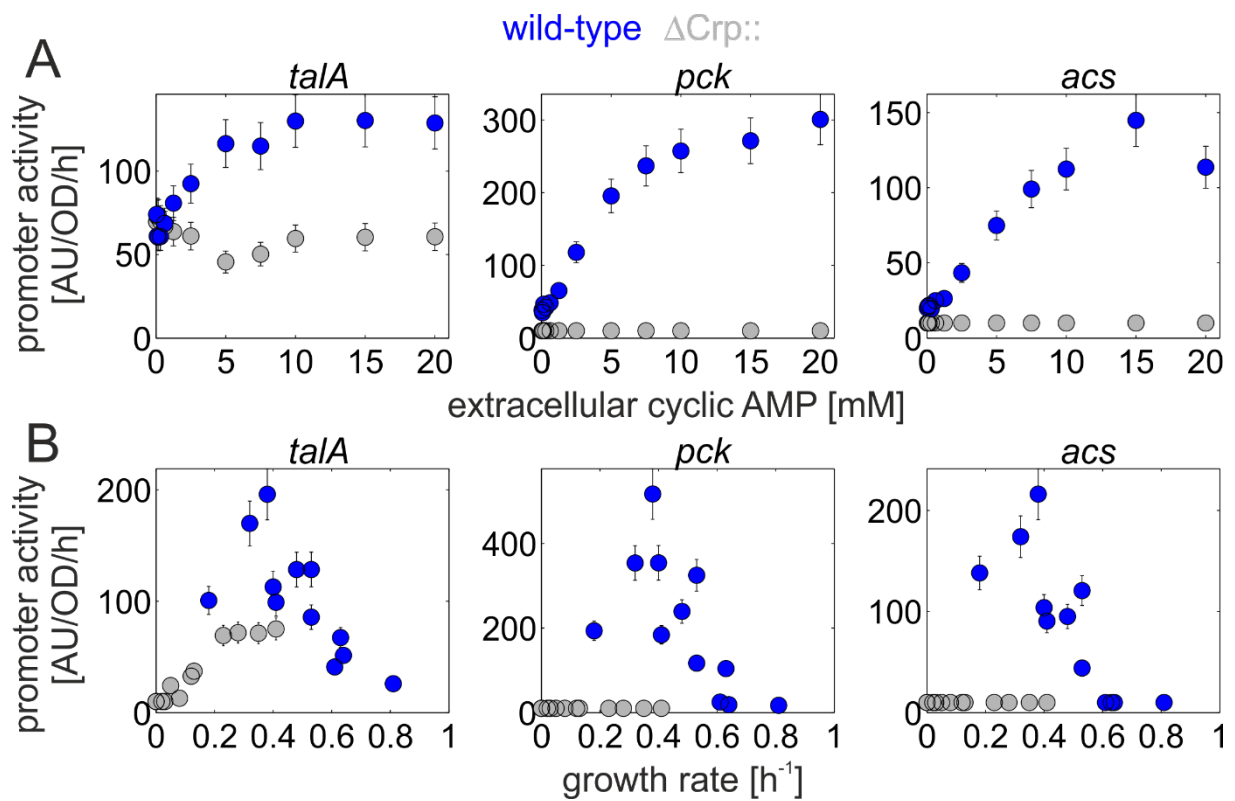

344

345 **Appendix Figure S19. Promoters *talA* and *pck* are activated by Crp. A)** Promoter activity of *talA*, *pck*,  
 346 and *acs*, during exponential growth in M9 glucose 2g/L with varying concentrations of externally  
 347 supplemented cyclic AMP, which activates the transcription factor Crp. Blue: wild-type strain, grey:  
 348 Crp deletion strain. Promoter activity error bars were estimated based on day-to-day reproducibility  
 349 measurements as described in appendix figure S3. **B)** Promoter activity of *talA*, *pck*, and *acs*, during  
 350 exponential growth on M9 minimal medium supplemented with 12 different single carbon sources  
 351 (galactose, acetate, pyruvate, succinate, mannose, glycerol, fructose, gluconate, glucose, lactate,  
 352 glcNAc, G6P). Blue: wild-type strain, grey: Crp deletion strain. Note that the Crp deletion strain shows  
 353 impaired growth in all conditions. Promoter activity error bars were estimated based on day-to-day  
 354 reproducibility measurements as described in appendix figure S3. Data are available in EV table 3 – 5  
 355 and EV table 3 - 6.

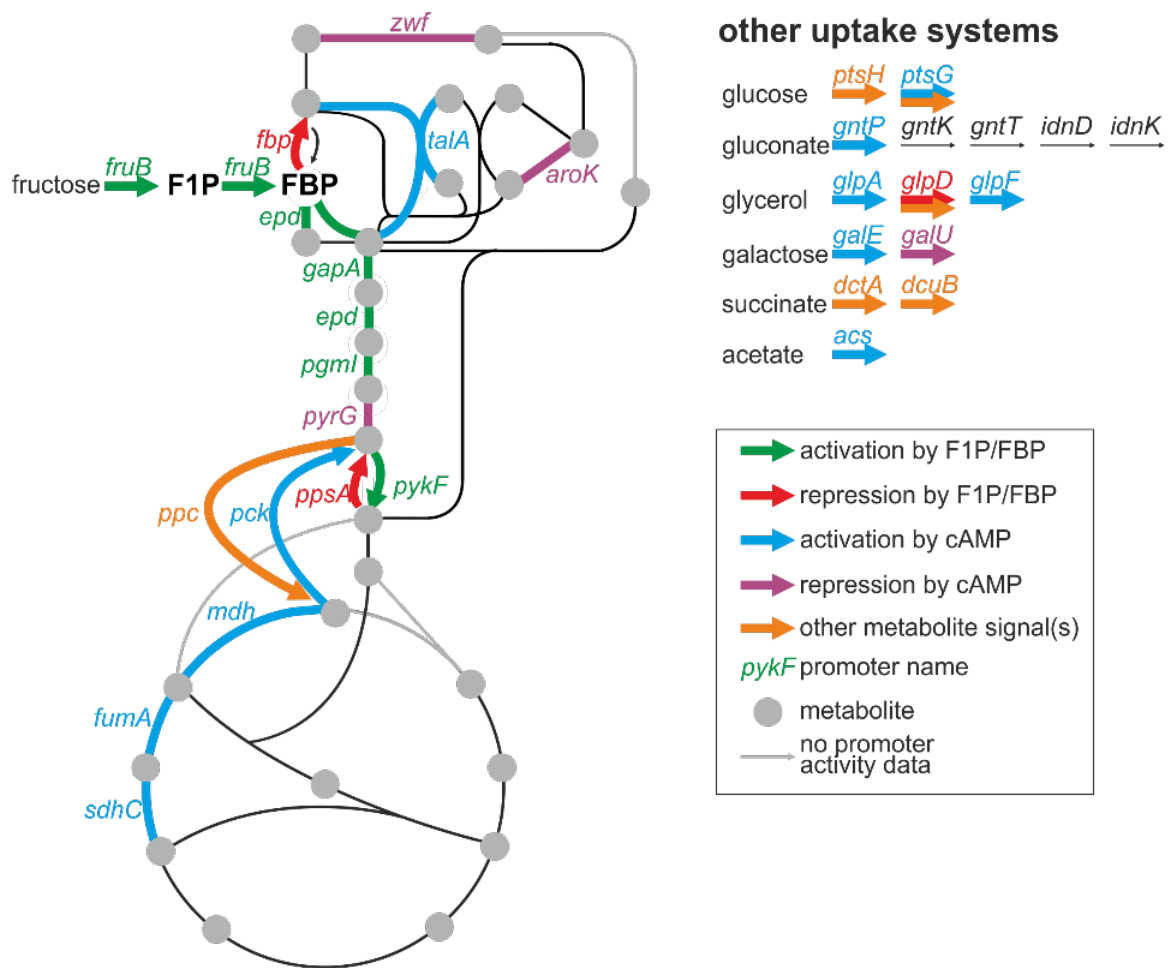

356

357 **Appendix Figure S20. Schematic of central carbon metabolism (CCM) with corresponding**  
 358 **transcriptional metabolite signals.** Metabolite signals as depicted in main figure 4A. Each CCM  
 359 reaction, for which at least promoter was quantified, is colored according to the identified  
 360 metabolite signal (see accompanying legend). The respective promoter name is written next to the  
 361 reaction. Note that some promoters, such as *epd*, drive the expression of more than one gene.  
 362 Information on transcriptional units was obtained from (Salgado *et al*, 2013).

363

364 **EV tables**

365

366 **EV Table 1:** List of promoters used in this study.

367 **EV Table 2:** List of conditions used in this study.

368 **EV Table 3:** Steady state promoter activity.

369 **EV Table 4:** Steady state global regulation as inferred by singular value decomposition.

370 **EV Table 5:** Dynamic promoter activities during diauxic shift from glucose to succinate with  
371 corresponding prediction based on growth dependent global regulation alone.

372 **EV Table 6:** Intracellular metabolite concentrations (relative and absolute concentration).

373 **EV Table 7:** Inferred promoter-metabolite and transcription factor-metabolite interaction network.

374 **EV Table 8:** Reported transcriptional regulatory network of promoters used in this study.

375

376 **References**

- 377 Burnham KP, Anderson DR & Huyvaert KP (2011) AIC model selection and multimodel inference in  
378 behavioral ecology: some background, observations, and comparisons. *Behav. Ecol. Sociobiol.*  
379 **65**: 23–35
- 380 Gerosa L, Haverkorn Van Rijsewijk BRB, Christodoulou D, Kochanowski K, Schmidt TSB, Noor E, Sauer  
381 U, Schmidt S, Noor E & Sauer U (2015) Pseudo-transition analysis identifies the key regulators of  
382 dynamic metabolic adaptations from steady-state data. *Cell Syst.* **1**: 270–282
- 383 Gerosa L, Kochanowski K, Heinemann M & Sauer U (2013) Dissecting specific and global  
384 transcriptional regulation of bacterial gene expression. *Mol. Syst. Biol.* **9**: 658
- 385 Ishihama A, Kori A, Koshio E, Yamada K, Maeda H, Shimada T, Makinoshima H, Iwata A & Fujita N  
386 (2014) Intracellular concentrations of 65 species of transcription factors with known regulatory  
387 functions in *Escherichia coli*. *J. Bacteriol.* **196**: 2718–2727
- 388 Keren L, Zackay O, Lotan-Pompan M, Barenholz U, Dekel E, Sasson V, Aidelberg G, Bren A, Zeevi D,  
389 Weinberger A, Alon U, Milo R & Segal E (2013) Promoters maintain their relative activity levels  
390 under different growth conditions. *Mol. Syst. Biol.* **9**: 701
- 391 Salgado H, Peralta-Gil M, Gama-Castro S, Santos-Zavaleta A, Muñiz-Rascado L, García-Sotelo JS, Weiss  
392 V, Solano-Lira H, Martínez-Flores I, Medina-Rivera A, Salgado-Osorio G, Alquicira-Hernández S,  
393 Alquicira-Hernández K, López-Fuentes A, Porrón-Sotelo L, Huerta AM, Bonavides-Martínez C,  
394 Balderas-Martínez YI, Pannier L, Olvera M, et al (2013) RegulonDB v8.0: omics data sets,  
395 evolutionary conservation, regulatory phrases, cross-validated gold standards and more.  
396 *Nucleic Acids Res.* **41**: D203-13
- 397 Storey JD (2002) A direct approach to false discovery rates. *J. R. Stat. Soc. Ser. B (Statistical Methodol.*  
398 **64**: 479–498
- 399
